# Supplementary material for: Antimicrobial Management of Skin and Soft Tissue Infections among Surgical Wards in South Africa: Findings and Implications
Source: MDPI journal article supplement (doi:10.3390/antibiotics12020275), 2023-01-31
Supplement: s1 [file s1]

**Supplementary Table S1:** Data collecting instrument

|                                                                |        |   |                                            |      |          |                              |   |        |                         |   |        |  |
|----------------------------------------------------------------|--------|---|--------------------------------------------|------|----------|------------------------------|---|--------|-------------------------|---|--------|--|
| <b>Skin and soft tissue infections</b>                         |        |   |                                            |      |          |                              |   |        |                         |   |        |  |
| <b>Patients details</b>                                        |        |   |                                            |      |          |                              |   |        |                         |   |        |  |
| Date:                                                          |        |   |                                            |      |          | Study no:                    |   |        |                         |   |        |  |
| Ward:                                                          |        |   |                                            | Bed: |          |                              |   |        |                         |   |        |  |
| Admission date:                                                |        |   |                                            |      |          |                              |   |        |                         |   |        |  |
| Discharge date:                                                |        |   |                                            |      |          | Dr:                          |   |        |                         |   |        |  |
| Gender:                                                        |        |   | Weight:                                    |      |          | Height:                      |   |        |                         |   |        |  |
| Allergy                                                        | Y      | N | Smoking                                    | Y    | N        | Alcohol                      | Y | N      | Caffeine                | Y | N      |  |
| Vital signs upon admission:<br>BP:<br>Temp:<br>Resp:<br>Pulse: |        |   |                                            |      |          | Other chronic conditions:    |   |        |                         |   |        |  |
| <b>Assessing for SSTI</b>                                      |        |   |                                            |      |          |                              |   |        |                         |   |        |  |
| The type of SSTIs:                                             |        |   |                                            |      |          |                              |   |        |                         |   |        |  |
| Uncomplicated SSTI?                                            | Y      | N | If yes, which type of uncomplicated SSTIs? |      |          |                              |   |        |                         |   |        |  |
|                                                                |        |   | Erysipelas                                 |      |          | Impertigo                    |   |        | Mild cellulitis         |   |        |  |
|                                                                |        |   | Edema                                      |      |          | Other?                       |   |        |                         |   |        |  |
| Complicated SSTIs?                                             | Y      | N | If yes, which type of complicated SSTIs?   |      |          |                              |   |        |                         |   |        |  |
|                                                                |        |   | Severe infective cellulitis                |      |          | Ulcers/ wound site infection |   |        | Surgical site infection |   |        |  |
|                                                                |        |   | Major abscesses                            |      |          | Infected burns               |   |        | Skin ulcers             |   |        |  |
|                                                                |        |   | Diabetic foot ulcers                       |      |          | Other?                       |   |        |                         |   |        |  |
| Clinical symptoms upon admission:                              |        |   |                                            |      |          |                              |   |        |                         |   |        |  |
| History of SSTI in the past:                                   |        |   |                                            |      |          |                              |   |        |                         |   |        |  |
| History of surgery in the infected area:                       |        |   |                                            |      |          |                              |   |        |                         |   |        |  |
| Abscess incision and drainage in the past year:                |        |   |                                            |      |          |                              |   |        |                         |   |        |  |
| Culture done?                                                  | Y      | N | If yes, which pathogen was found?          |      |          |                              |   |        |                         |   |        |  |
| <b>Assessing antimicrobials</b>                                |        |   |                                            |      |          |                              |   |        |                         |   |        |  |
| Antimicrobial exposure in the last month?                      |        |   | Y                                          | N    | Reasons? |                              |   |        |                         |   |        |  |
| Antibiotics information                                        | Drug 1 |   |                                            |      | Drug 2   |                              |   | Drug 3 |                         |   | Drug 4 |  |
| Name:                                                          |        |   |                                            |      |          |                              |   |        |                         |   |        |  |
| Dose:                                                          |        |   |                                            |      |          |                              |   |        |                         |   |        |  |

|                                              |  |  |  |  |
|----------------------------------------------|--|--|--|--|
| Frequency:                                   |  |  |  |  |
| Route:                                       |  |  |  |  |
| Start date:                                  |  |  |  |  |
| Stop date:                                   |  |  |  |  |
| Is the treatment in line with SA guidelines? |  |  |  |  |
